# Supplementary material for: El norte del País Valenciano: : geomorfología litoral y prelitoral
Source: Royal Society of Chemistry journal article supplement (doi:10.1039/d4dt00563e), 1982-01-01
Supplement: d4dt00563e2.pdf [file d4dt00563e2.pdf]

Supporting Information for:

**Computational design of cooperatively acting molecular catalyst systems: carbene based tungsten- or molybdenum-catalysts with rhodium- or iridium-complexes for the ionic hydrogenation of N<sub>2</sub> to NH<sub>3</sub>**

Totan Mondal<sup>a</sup>, Walter Leitner,<sup>a,b</sup> Markus Hölscher<sup>a\*</sup>

<sup>a</sup>Institut für Technische und Makromolekulare Chemie, RWTH Aachen University, Worringerweg 2, 52074 Aachen, Germany. E-mail: [hoelscher@itmc.rwth-aachen.de](mailto:hoelscher@itmc.rwth-aachen.de), [leitner@itmc.rwth-aachen.de](mailto:leitner@itmc.rwth-aachen.de)

<sup>b</sup>Max Planck Institute for Chemical Energy Conversion, Mülheim an der Ruhr, Germany, E-Mail: [walter.leitner@cec.mpg.de](mailto:walter.leitner@cec.mpg.de)

Table of Contents

|    |                                                                                                                              |    |
|----|------------------------------------------------------------------------------------------------------------------------------|----|
| 1. | Computational details.....                                                                                                   | 2  |
| 2. | DFT functional test.....                                                                                                     | 2  |
| 3  | End-on ( <b>L<math>\eta</math>-1<sup>E</sup></b> ) vs. side-on ( <b>L<math>\eta</math>-1<sup>S</sup></b> ) coordination..... | 3  |
| 4  | Full catalytic cycle for the catalytic systems <b>W-L4<sup>Rh</sup></b> and <b>W-L7<sup>Rh</sup></b> .....                   | 5  |
| 5  | Reaction energetics associated with molybdenum pincer complexes.....                                                         | 5  |
| 6  | Different spin states.....                                                                                                   | 6  |
| 7  | Solvent effects.....                                                                                                         | 7  |
| 8  | Possible side reactions.....                                                                                                 | 7  |
| 9  | Calculated energies in detail.....                                                                                           | 9  |
| 10 | Literature.....                                                                                                              | 22 |

## 1. Computational details

The study utilized the Gaussian 16 (Revision B.01)<sup>1</sup> software package with default convergence limits for all quantum chemical computations. Standard algorithms implemented in the Gaussian16 program were used to locate necessary geometries (minima and transition states), i.e., the GEDIIS algorithm for minimization and the Berny algorithm code for the transition state. Geometry optimizations were performed without symmetry constraints in an implicit solvent environment to accurately replicate experimental conditions. To account for the influence of acetonitrile solvent ( $\epsilon = 36.64$ ), the self-consistent reaction field (SCRF) technique based on the SMD<sup>2</sup> continuum solvation model was used. The B97 density functional combined with the Becke-Johnson damping enhanced Grimme D3-dispersion correction (B97-D3(BJ))<sup>3-6</sup> was used to assess the influence of dispersion on geometry and energy. The Ahlrich's formulated triple- $\zeta$  basis set (def2-TZVP)<sup>7-9</sup>, coupled with the related ECP<sup>10</sup> for the metal centers, was used to build wavefunctions for the systems under investigation.

Furthermore, vibration frequency calculations were performed on the converged geometries using the same theoretical level to verify whether actual minima ( $N_{\text{img}} = 0$ ) or saddle points ( $N_{\text{img}} = 1$ ) were reached and to obtain necessary thermodynamic energy corrections. Moreover, a pressure correction of 471 atm was applied to align with standard state conditions for acetonitrile. Numerical integrations during computations used an ultrafine grid (99,950). To verify accurate imaginary modes, a visual inspection of the vibrational direction of the pertinent atoms was conducted. In cases of ambiguity, additional IRC (Intrinsic Reaction Coordinate) calculations were conducted to authenticate true transition states.

Discussions throughout the manuscript focused on B97-D3BJ/def2-TZVP/IEFPCM and SMD (acetonitrile) free energies ( $\Delta G$ ), unless specified otherwise. All optimized structures are available as mol files in a separate document for reference.

## 2. DFT functional test

The selection of the B97D3-BJ functional for this study was primarily based on its computational efficiency and its consistency with our prior investigations into metal-ligand complexes, aligning well with experimental findings. However, we undertook a comprehensive comparative study that included other DFT functionals, specifically PBE0-D3BJ<sup>11,12</sup>, B3LYP-D3BJ<sup>11,13,14</sup>, and M06-L<sup>15</sup>. To accomplish this, we fully optimized the critical intermediates and transition states of the catalyst **W-L1**<sup>Rh</sup> in an acetonitrile solvent environment, investigating the changes in energy span.

Notably, all the functionals yielded similar trends, with **TS10** consistently exhibiting higher energy than **TS8**, and intermediate **16** displaying significant stabilities (Figure S1). The energy span calculated using PBE0-D3BJ was approximately 3 kcal/mol lower compared to the values computed with B97D3-BJ. In contrast, the other two functionals showed relatively higher energy spans of 3.6 kcal/mol, which remained within the acceptable range of DFT error. Consequently, we proceeded with the B97D3-BJ computed values for further comparison and a more in-depth understanding of the entire catalytic cycle.

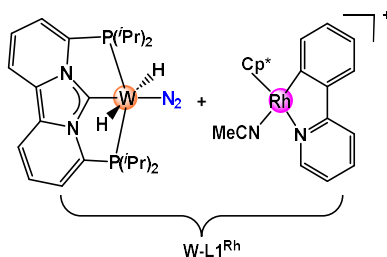

| <b>W-L1<sup>Rh</sup></b> | <b>B97D3-BJ</b> | <b>PBE0-D3BJ</b> | <b>B3LYP-D3BJ</b> | <b>M06L</b> |
|--------------------------|-----------------|------------------|-------------------|-------------|
| <b>1'</b>                | 0.0             | 0.0              | 0.0               | 0.0         |
| <b>TS8</b>               | 29.1            | 13.8             | 21.7              | 29.5        |
| <b>TS10</b>              | 31.6            | 23.2             | 27.5              | 37.0        |
| <b>16</b>                | -21.0           | -41.9            | -35.8             | -27.0       |
| <b>ES</b>                | 32.4            | 29.3             | 37.0              | 37.0        |

**Fig. S1** Relative Gibbs free energies  $\Delta G$  (kcal/mol) of the selected intermediates and transition states for the **W-L1<sup>Rh</sup>** catalyst system, computed at various DFT levels.

### 3 End-on (**Ln-1<sup>E</sup>**) vs. side-on (**Ln-1<sup>S</sup>**) coordination

The relative stability differences between end-on and side-on  $N_2$  tungsten complexes was checked for completeness. Depending on the ligand chosen the energy differences can be as low as 3.5 kcal/mol (**L12**) in favor of the end-on complex. Therefore, it is not impossible to envision that by choosing an appropriate ligand (even if it was chosen accidentally) the side-on bonded complex might be more stable. This in turn could have consequences with regard to the catalytic cycle. However, as our results show, this possibility does not come into play with the ligands chosen in this work.

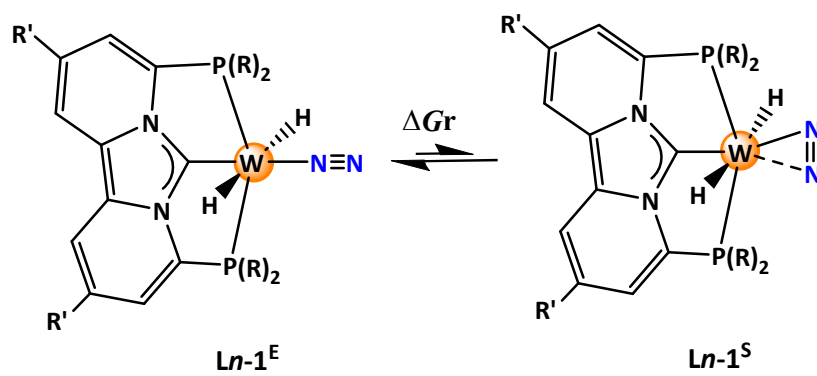

| $\text{Ln}$ | R                                | R' | $\Delta G_r$ |
|-------------|----------------------------------|----|--------------|
| L1          | <i>i</i> Pr                      | H  | 17.8         |
| L2          | <i>t</i> Bu                      | H  | 8.5          |
| L3          | Ph                               | H  | 15.7         |
| L4          | Ph( <i>p</i> -CF <sub>3</sub> )  | H  | 3.6          |
| L5          | Ph( <i>p</i> -F)                 | H  | 4.8          |
| L6          | Ph( <i>p</i> -Me)                | H  | 6.1          |
| L7          | Mes                              | H  | 11.0         |
| L8          | Ph( <i>p</i> -NMe <sub>2</sub> ) | H  | 6.1          |
| L9          | CF <sub>3</sub>                  | H  | 13.7         |
| L10         | <i>i</i> Pr                      | Me | 18.3         |
| L11         | <i>i</i> Pr                      | F  | 17.7         |
| L12         | Ph( <i>p</i> -CF <sub>3</sub> )  | Me | 3.5          |

**Fig. S2** Relative Gibbs free energies  $\Delta G_r$  (kcal/mol) of various end-on ( $\text{Ln-1}^{\text{E}}$ )  $\text{N}_2$  coordinated tungsten pincer complexes compare to side-on ( $\text{Ln-1}^{\text{S}}$ )  $\text{N}_2$  coordinated complexes.

#### 4 Full catalytic cycle for the catalytic systems **W-L4<sup>Rh</sup>** and **W-L7<sup>Rh</sup>**

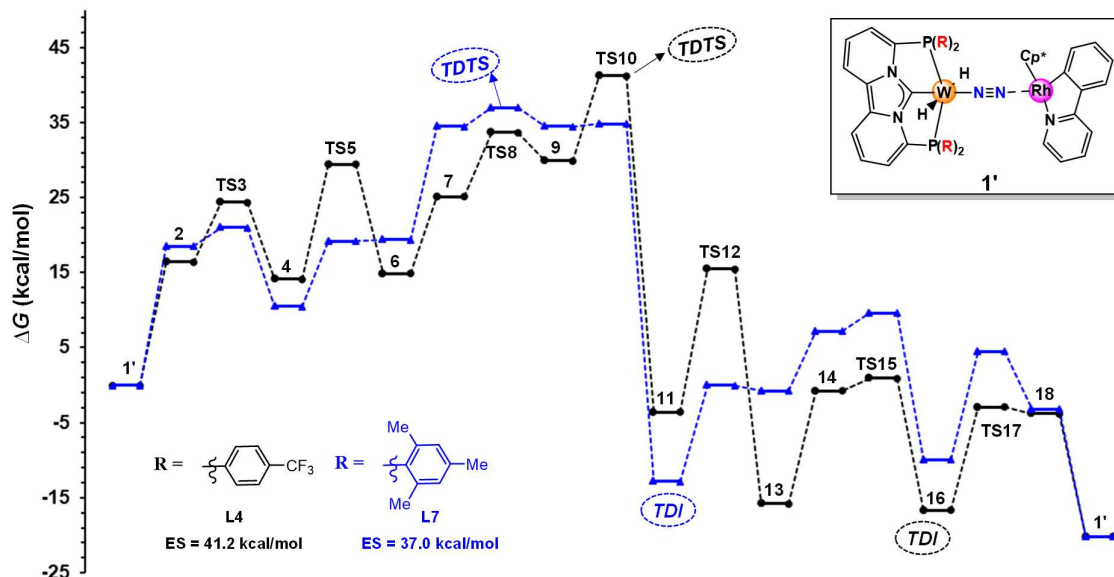

**Fig. S3** Minimum energy pathway for the direct hydrogenation of  $N_2$  to  $NH_3$  for the catalysts **W-L4<sup>Rh</sup>** and **W-L7<sup>Rh</sup>**, calculated at the B97D3-BJ/def2-TZVP/IEF-PCM, SMD( $CH_3CN$ ) level of theory. The relative Gibbs free energies ( $\Delta G$ ) are in kcal/mol.

#### 5 Reaction energetics associated with molybdenum pincer complexes

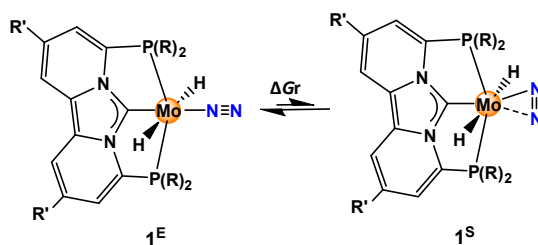

| Ln  | R           | R' | $\Delta Gr$ (kcal/mol) |
|-----|-------------|----|------------------------|
| L1  | <i>i</i> Pr | H  | 18.4                   |
| L2  | <i>t</i> Bu | H  | 9.9                    |
| L10 | <i>i</i> Pr | Me | 18.4                   |
| L11 | <i>i</i> Pr | F  | 16.5                   |

**Fig. S4** Relative Gibbs free energies  $\Delta Gr$  (kcal/mol) of various end-on (**Ln-1<sup>E</sup>**)  $N_2$  coordinated molybdenum pincer complexes compare to side-on (**Ln-1<sup>S</sup>**)  $N_2$  coordinated complexes.

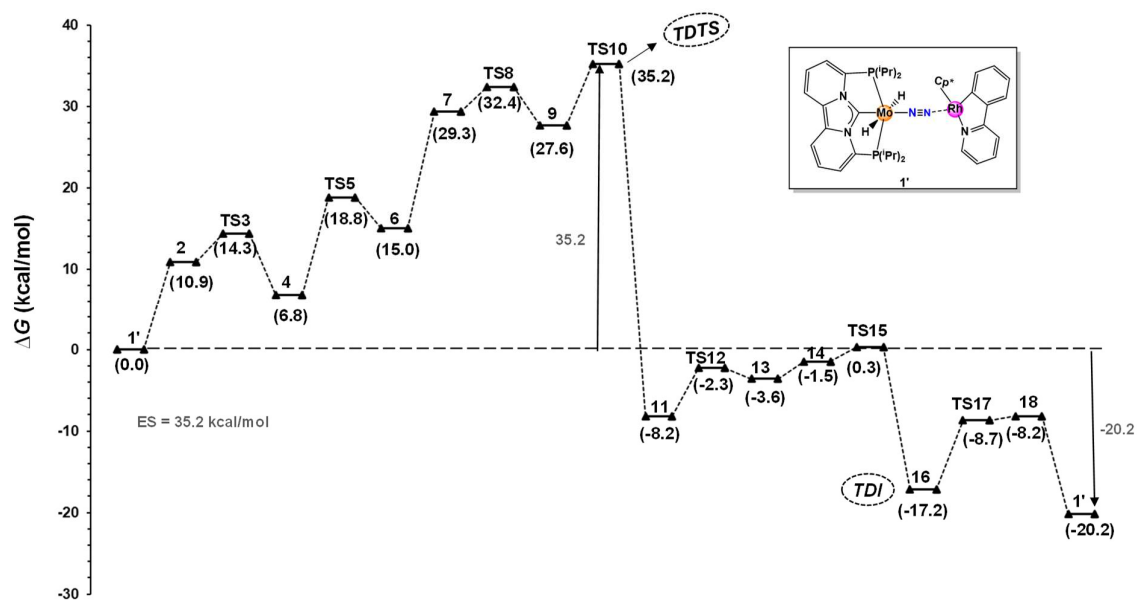

**Fig. S5** Minimum energy pathway for the catalyst **Mo-L1<sup>Rh</sup>**, calculated at the B97D3-BJ/def2-TZVP/IEF-PCM, SMD(CH<sub>3</sub>CN) level of theory.

## 6 Different spin states

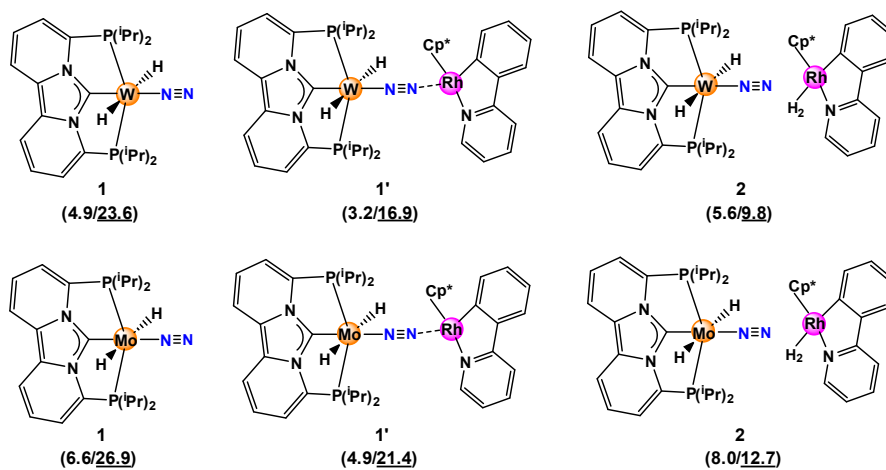

**Fig. S6** Relative Gibbs free energies  $\Delta G$  (kcal/mol) of the **triplet/quintet** spin states with respect to the singlet spin state, computed at the B97D3-BJ/def2-TZVP/IEF-PCM, SMD(CH<sub>3</sub>CN) level of theory.

## 7 Solvent effects

**Table S1** Relative Gibbs free energies (in kcal/mol) of selected stationary points of the catalytic cycle shown in Scheme 2 with tungsten/molybdenum complexes containing the ligand **L1** in two different solvents.

|                   | <b>W-L1<sup>Rh</sup></b>  |             |           |                         |
|-------------------|---------------------------|-------------|-----------|-------------------------|
|                   | <b>TS8</b>                | <b>TS10</b> | <b>16</b> | <b>ES<sup>[a]</sup></b> |
| Acetonitrile      | 29.1                      | 31.6        | -21.0     | 32.4                    |
| Dimethylsulfoxide | 30.1                      | 33.3        | -19.8     | 33.3                    |
|                   | <b>Mo-L1<sup>Rh</sup></b> |             |           |                         |
| Acetonitrile      | 32.4                      | 35.2        | -17.2     | 35.2                    |
| Dimethylsulfoxide | 33.9                      | 35.6        | -16.8     | 35.6                    |

[a] ES = energy span;  $\Delta G = -20.2$  kcal/mol [reaction Gibbs free in acetonitrile solvent];  $\Delta G = -20.4$  kcal/mol [reaction Gibbs free in dimethylsulfoxide solvent]

## 8 Possible side reactions

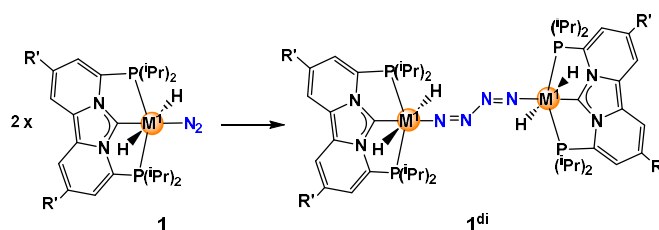

| <b>M<sup>1</sup> = W</b>  |    |            |
|---------------------------|----|------------|
| <i>Ln</i>                 | R' | $\Delta G$ |
| L1                        | H  | 45.0       |
| L10                       | Me | 44.5       |
| L11                       | F  | 45.8       |
| <b>M<sup>1</sup> = Mo</b> |    |            |
| L1                        | H  | 55.3       |
| L10                       | Me | 55.4       |
| L11                       | F  | 56.7       |

**Fig. S7** Relative Gibbs free energies  $\Delta G$  (kcal/mol) for the dimerization reaction **1**→**1<sup>di</sup>**.

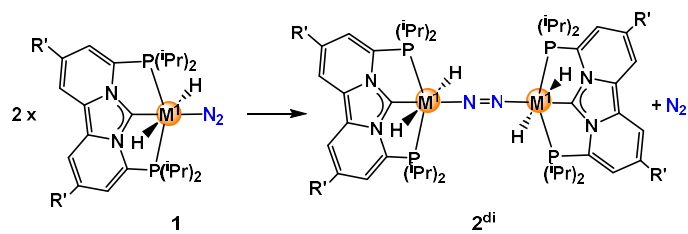

$M^1 = W$

| $L_n$ | $R'$ | $\Delta G$ |
|-------|------|------------|
| L1    | H    | -13.7      |
| L10   | Me   | -13.8      |
| L11   | F    | -12.9      |

$M^1 = Mo$

|     |    |      |
|-----|----|------|
| L1  | H  | -6.1 |
| L10 | Me | -5.2 |
| L11 | F  | -4.7 |

**Fig. S8** Relative Gibbs free energies  $\Delta G$  (kcal/mol) for the dimerization reaction  $1 \rightarrow 2^{\text{di}}$ .

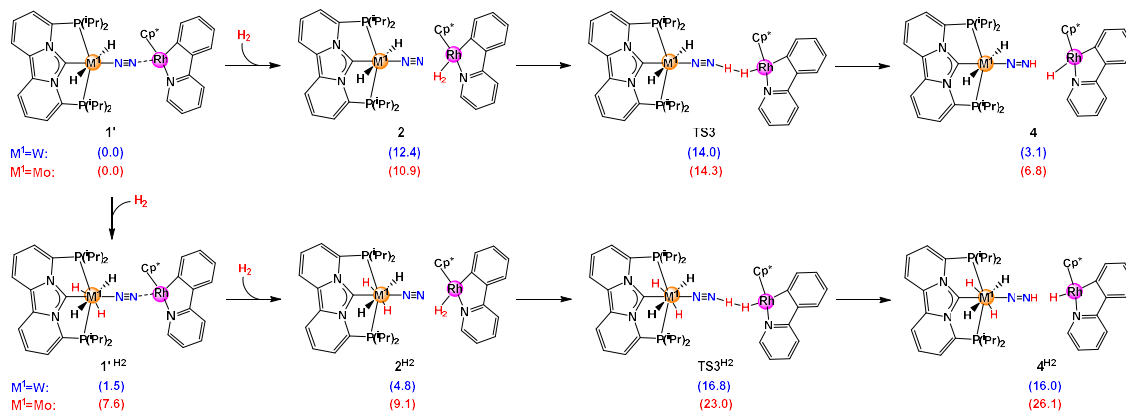

**Fig. S9** Relative Gibbs free energies  $\Delta G$  (kcal/mol) calculated at the B97D3-BJ/def2-TZVP/IEF-PCM, SMD(CH<sub>3</sub>CN) level of theory.



## 9 Calculated energies in detail

**Table S2** Computed energies (E), zero-point energy corrected energies ( $E_{zpe}$ ), enthalpies (H) and Gibbs free energies (G; all in Hartree, at the B97D3-BJ/def2-TZVP/IEF-PCM, SMD(CH<sub>3</sub>CN) level of theory) of various end-on (**Ln-1<sup>E</sup>**) and side-on (**Ln-1<sup>S</sup>**) N<sub>2</sub> coordinated tungsten pincer complexes as shown in Fig.S1 of the main paper. Relative Gibbs free reaction energies are given as well ( $\Delta G_{rel}$ ; in kcal/mol).

| Compd.                   | E            | $E_{zpe}$    | H            | G            | $\Delta G_{rel}$ |
|--------------------------|--------------|--------------|--------------|--------------|------------------|
| <b>L1-1<sup>E</sup></b>  | -1866.972491 | -1866.435345 | -1866.399919 | -1866.493205 |                  |
| <b>L1-1<sup>S</sup></b>  | -1866.943744 | -1866.407839 | -1866.372131 | -1866.464918 | 17.8             |
| <b>L2-1<sup>E</sup></b>  | -2024.168439 | -2023.521282 | -2023.480778 | -2023.581493 |                  |
| <b>L2-1<sup>S</sup></b>  | -2024.156045 | -2023.508489 | -2023.468359 | -2023.56788  | 8.5              |
| <b>L3-1<sup>E</sup></b>  | -2319.246871 | -2318.723968 | -2318.686867 | -2318.788816 |                  |
| <b>L3-1<sup>S</sup></b>  | -2319.219842 | -2318.697156 | -2318.65908  | -2318.763723 | 15.7             |
| <b>L4-1<sup>E</sup></b>  | -3667.3497   | -3666.811477 | -3666.758568 | -3666.902695 |                  |
| <b>L4-1<sup>S</sup></b>  | -3667.343214 | -3666.805575 | -3666.752608 | -3666.89696  | 3.6              |
| <b>L5-1<sup>E</sup></b>  | -2716.185914 | -2715.695758 | -2715.654457 | -2715.766564 |                  |
| <b>L5-1<sup>S</sup></b>  | -2716.17798  | -2715.687838 | -2715.646567 | -2715.758917 | 4.8              |
| <b>L6-1<sup>E</sup></b>  | -2476.477609 | -2475.84821  | -2475.802626 | -2475.926883 |                  |
| <b>L6-1<sup>S</sup></b>  | -2476.46918  | -2475.83957  | -2475.794151 | -2475.917122 | 6.1              |
| <b>L7-1<sup>E</sup></b>  | -2790.90671  | -2790.058587 | -2790.001186 | -2790.143642 |                  |
| <b>L7-1<sup>S</sup></b>  | -2790.88827  | -2790.040564 | -2789.983265 | -2790.126079 | 11.0             |
| <b>L8-1<sup>E</sup></b>  | -2855.01463  | -2854.206619 | -2854.150363 | -2854.297859 |                  |
| <b>L8-1<sup>S</sup></b>  | -2855.004762 | -2854.197468 | -2854.141294 | -2854.288087 | 6.1              |
| <b>L9-1<sup>E</sup></b>  | -2743.348701 | -2743.127745 | -2743.093682 | -2743.189406 |                  |
| <b>L9-1<sup>S</sup></b>  | -2743.329408 | -2743.107319 | -2743.0736   | -2743.167534 | 13.7             |
| <b>L10-1<sup>E</sup></b> | -1945.5877   | -1944.996988 | -1944.957885 | -1945.059379 |                  |
| <b>L10-1<sup>S</sup></b> | -1945.558679 | -1944.968938 | -1944.929594 | -1945.03016  | 18.3             |
| <b>L11-1<sup>E</sup></b> | -2065.43536  | -2064.914959 | -2064.87759  | -2064.975221 |                  |
| <b>L11-1<sup>S</sup></b> | -2065.406744 | -2064.88748  | -2064.849779 | -2064.947045 | 17.7             |
| <b>L12-1<sup>E</sup></b> | -3745.964844 | -3745.372845 | -3745.316433 | -3745.468236 |                  |
| <b>L12-1<sup>S</sup></b> | -3745.95852  | -3745.36764  | -3745.310775 | -3745.462666 | 3.5              |

**Table S3** Computed energies (E), zero-point energy corrected energies ( $E_{zpe}$ ), enthalpies (H) and Gibbs free energies (G; all in Hartree) for the acetonitrile replacement reaction from the rhodium complex for the various tungsten pincer-ligand complexes as shown in Fig. 1 of the main paper. Relative Gibbs free reaction energies are given as well ( $\Delta G_{rel}$ ; in kcal/mol).

| Compd.                       | E            | $E_{zpe}$    | H            | G            | $\Delta G_{rel}$ |
|------------------------------|--------------|--------------|--------------|--------------|------------------|
| <b>Rh-cp</b>                 | -1112.12527  | -1111.704187 | -1111.675381 | -1111.755821 |                  |
| <b>MeCN</b>                  | -132.7304319 | -132.686275  | -132.681719  | -132.704476  |                  |
| <b>L1-1<sup>E</sup></b>      | -1866.972491 | -1866.435345 | -1866.399919 | -1866.493205 |                  |
| <b>W-L1<sup>Rh-1'</sup></b>  | -2846.386837 | -2845.471761 | -2845.41274  | -2845.555253 | -6.7             |
| <b>L2-1<sup>E</sup></b>      | -2024.168439 | -2023.521282 | -2023.480778 | -2023.581493 |                  |
| <b>W-L2<sup>Rh-1'</sup></b>  | -3003.586048 | -3002.560026 | -3002.495228 | -3002.647537 | -9.2             |
| <b>L3-1<sup>E</sup></b>      | -2319.246871 | -2318.723968 | -2318.686867 | -2318.788816 |                  |
| <b>W-L3<sup>Rh-1'</sup></b>  | -3298.679193 | -3297.778365 | -3297.716175 | -3297.870248 | -18.9            |
| <b>L4-1<sup>E</sup></b>      | -3667.3497   | -3666.811477 | -3666.758568 | -3666.902695 |                  |
| <b>W-L4<sup>Rh-1'</sup></b>  | -4646.781917 | -4645.864704 | -4645.787789 | -4645.981044 | -16.9            |
| <b>L5-1<sup>E</sup></b>      | -2716.185914 | -2715.695758 | -2715.654457 | -2715.766564 |                  |
| <b>W-L5<sup>Rh-1'</sup></b>  | -3695.619126 | -3694.750386 | -3694.684947 | -3694.846541 | -18.0            |
| <b>L6-1<sup>E</sup></b>      | -2476.477609 | -2475.84821  | -2475.802626 | -2475.926883 |                  |
| <b>W-L6<sup>Rh-1'</sup></b>  | -3455.910815 | -3454.902788 | -3454.833951 | -3455.00451  | -16.5            |
| <b>L7-1<sup>E</sup></b>      | -2790.90671  | -2790.058587 | -2790.001186 | -2790.143642 |                  |
| <b>W-L7<sup>Rh-1'</sup></b>  | -3770.333214 | -3769.107969 | -3769.02612  | -3769.220511 | -16.0            |
| <b>L8-1<sup>E</sup></b>      | -2855.01463  | -2854.206619 | -2854.150363 | -2854.297859 |                  |
| <b>W-L8<sup>Rh-1'</sup></b>  | -3834.451297 | -3833.265588 | -3833.18509  | -3833.381038 | -20.0            |
| <b>L9-1<sup>E</sup></b>      | -2743.348701 | -2743.127745 | -2743.093682 | -2743.189406 |                  |
| <b>W-L9<sup>Rh-1'</sup></b>  | -3722.75853  | -3722.160343 | -3722.10177  | -3722.249529 | -5.5             |
| <b>L1-10<sup>E</sup></b>     | -1945.5877   | -1944.996988 | -1944.957885 | -1945.059379 |                  |
| <b>W-L10<sup>Rh-1'</sup></b> | -2925.003056 | -2924.034458 | -2923.970853 | -2924.124567 | -8.7             |
| <b>L1-11<sup>E</sup></b>     | -2065.43536  | -2064.914959 | -2064.87759  | -2064.975221 |                  |
| <b>W-L11<sup>Rh-1'</sup></b> | -3044.848991 | -3043.95056  | -3043.888706 | -3044.038853 | -7.7             |
| <b>L1-12<sup>E</sup></b>     | -3745.964844 | -3745.372845 | -3745.316433 | -3745.468236 |                  |
| <b>W-L12<sup>Rh-1'</sup></b> | -4725.398345 | -4724.42757  | -4724.34692  | -4724.546747 | -17.0            |

**Table S4** Computed energies (E), zero-point energy corrected energies ( $E_{zpe}$ ), enthalpies (H) and Gibbs free energies (G; all in Hartree) of the different stationary points as shown in Fig. 2 of the main paper.

| Compd.                        | E            | $E_{zpe}$    | H            | G            | $\Delta G_{rel}$ |
|-------------------------------|--------------|--------------|--------------|--------------|------------------|
| <b>H<sub>2</sub></b>          | -1.1829428   | -1.173025    | -1.16972     | -1.17871     |                  |
| <b>W-L1<sup>Rh</sup>-1'</b>   | -2846.386837 | -2845.471761 | -2845.41274  | -2845.555253 |                  |
| <b>W-L1<sup>Rh</sup>-TS8</b>  | -2848.728621 | -2847.778916 | -2847.717604 | -2847.866303 | 29.1             |
| <b>W-L2<sup>Rh</sup>-1'</b>   | -3003.586048 | -3002.560026 | -3002.495228 | -3002.647537 |                  |
| <b>W-L2<sup>Rh</sup>-TS8</b>  | -3005.923822 | -3004.864479 | -3004.79788  | -3004.956887 | 30.2             |
| <b>W-L3<sup>Rh</sup>-1'</b>   | -3298.679193 | -3297.778365 | -3297.716175 | -3297.870248 |                  |
| <b>W-L3<sup>Rh</sup>-TS8</b>  | -3301.015338 | -3300.077921 | -3300.01477  | -3300.173687 | 33.9             |
| <b>W-L4<sup>Rh</sup>-1'</b>   | -4646.781917 | -4645.864704 | -4645.787789 | -4645.981044 |                  |
| <b>W-L4<sup>Rh</sup>-TS8</b>  | -4649.121122 | -4648.167621 | -4648.089693 | -4648.284719 | 33.7             |
| <b>W-L5<sup>Rh</sup>-1'</b>   | -3695.619126 | -3694.750386 | -3694.684947 | -3694.846541 |                  |
| <b>W-L5<sup>Rh</sup>-TS8</b>  | -3697.954642 | -3697.050777 | -3696.983996 | -3697.15123  | 33.1             |
| <b>W-L6<sup>Rh</sup>-1'</b>   | -3455.910815 | -3454.902788 | -3454.833951 | -3455.00451  |                  |
| <b>W-L6<sup>Rh</sup>-TS8</b>  | -3458.247606 | -3457.203876 | -3457.1332   | -3457.308307 | 33.6             |
| <b>W-L7<sup>Rh</sup>-1'</b>   | -3770.333214 | -3769.107969 | -3769.02612  | -3769.220511 |                  |
| <b>W-L7<sup>Rh</sup>-TS8</b>  | -3772.665223 | -3771.405054 | -3771.321868 | -3771.519012 | 37.0             |
| <b>W-L8<sup>Rh</sup>-1'</b>   | -3834.451297 | -3833.265588 | -3833.18509  | -3833.381038 |                  |
| <b>W-L8<sup>Rh</sup>-TS8</b>  | -3836.787641 | -3835.566236 | -3835.484618 | -3835.684    | 34.2             |
| <b>W-L9<sup>Rh</sup>-1'</b>   | -3722.75853  | -3722.160343 | -3722.10177  | -3722.249529 |                  |
| <b>W-L9<sup>Rh</sup>-TS8</b>  | -3725.106069 | -3724.471319 | -3724.41193  | -3724.561511 | 28.5             |
| <b>W-L10<sup>Rh</sup>-1'</b>  | -2925.003056 | -2924.034458 | -2923.970853 | -2924.124567 |                  |
| <b>W-L10<sup>Rh</sup>-TS8</b> | -2927.344065 | -2926.340713 | -2926.275728 | -2926.432867 | 30.8             |
| <b>W-L11<sup>Rh</sup>-1'</b>  | -3044.848991 | -3043.95056  | -3043.888706 | -3044.038853 |                  |
| <b>W-L11<sup>Rh</sup>-TS8</b> | -3047.190435 | -3046.257139 | -3046.193998 | -3046.346847 | 31.0             |
| <b>W-L12<sup>Rh</sup>-1'</b>  | -4725.398345 | -4724.42757  | -4724.34692  | -4724.546747 |                  |
| <b>W-L12<sup>Rh</sup>-TS8</b> | -4727.736779 | -4726.729703 | -4726.64811  | -4726.849959 | 34.0             |

**Table S5** Computed energies (E), zero-point energy corrected energies ( $E_{zpe}$ ), enthalpies (H) and Gibbs free energies (G; all in Hartree) of the different stationary points involved in the direct hydrogenation of  $N_2$  to  $NH_3$  utilizing the catalyst  $W-L1^{Rh}$ , as shown in Fig. 3 of the main paper.

| Compd.           | E            | $E_{zpe}$    | H            | G            | $\Delta G_{rel}$ |
|------------------|--------------|--------------|--------------|--------------|------------------|
| $H_2$            | -1.1829428   | -1.173025    | -1.16972     | -1.17871     |                  |
| $N_2$            | -109.4988745 | -109.493463  | -109.490158  | -109.506089  |                  |
| $NH_3$           | -56.5583513  | -56.524939   | -56.521127   | -56.537173   |                  |
| $W-L1^{Rh-1'}$   | -2846.386837 | -2845.471761 | -2845.41274  | -2845.555253 |                  |
| $W-L1^{Rh-2}$    | -2847.558247 | -2846.627689 | -2846.566725 | -2846.71422  | 12.4             |
| $W-L1^{Rh-TS3}$  | -2847.552404 | -2846.62469  | -2846.564181 | -2846.711683 | 14.0             |
| $W-L1^{Rh-4}$    | -2847.574311 | -2846.641092 | -2846.579944 | -2846.729038 | 3.1              |
| $W-L1^{Rh-TS5}$  | -2847.552884 | -2846.623992 | -2846.562718 | -2846.712814 | 13.3             |
| $W-L1^{Rh-6}$    | -2847.568203 | -2846.631483 | -2846.570504 | -2846.719861 | 8.8              |
| $W-L1^{Rh-7}$    | -2848.73645  | -2847.784624 | -2847.722733 | -2847.872055 | 25.5             |
| $W-L1^{Rh-TS8}$  | -2848.728621 | -2847.778916 | -2847.717604 | -2847.866303 | 29.1             |
| $W-L1^{Rh-9}$    | -2848.74033  | -2847.786112 | -2847.724497 | -2847.875864 | 23.1             |
| $W-L1^{Rh-TS10}$ | -2848.7251   | -2847.772405 | -2847.710254 | -2847.86233  | 31.6             |
| $W-L1^{Rh-11}$   | -2792.23145  | -2791.313849 | -2791.253625 | -2791.403084 | -17.3            |
| $W-L1^{Rh-TS12}$ | -2792.220237 | -2791.305859 | -2791.246737 | -2791.389753 | -8.9             |
| $W-L1^{Rh-13}$   | -2792.226008 | -2791.308595 | -2791.248517 | -2791.395866 | -12.8            |
| $W-L1^{Rh-14}$   | -2793.4123   | -2792.478652 | -2792.417496 | -2792.566721 | -7.9             |
| $W-L1^{Rh-TS15}$ | -2793.408789 | -2792.478246 | -2792.417183 | -2792.565693 | -7.2             |
| $W-L1^{Rh-16}$   | -2793.442194 | -2792.502906 | -2792.442712 | -2792.587681 | -21.0            |
| $W-L1^{Rh-TS17}$ | -2793.421995 | -2792.484472 | -2792.424497 | -2792.569571 | -9.6             |
| $W-L1^{Rh-18}$   | -2793.427345 | -2792.484395 | -2792.424421 | -2792.56986  | -9.8             |

**Table S6** Computed energies (E), zero-point energy corrected energies ( $E_{zpe}$ ), enthalpies (H) and Gibbs free energies (G; all in Hartree) of the selected stationary points as shown in Table 1 of the main paper.

| Ligand     | Compd.                        | E            | $E_{zpe}$    | H            | G            | $\Delta G_{rel}$ |
|------------|-------------------------------|--------------|--------------|--------------|--------------|------------------|
|            | H <sub>2</sub>                | -1.1829428   | -1.173025    | -1.16972     | -1.17871     |                  |
| <b>L2</b>  | <b>W-L2<sup>Rh</sup>-1'</b>   | -3003.586048 | -3002.560026 | -3002.495228 | -3002.647537 |                  |
|            | <b>W-L2<sup>Rh</sup>-TS8</b>  | -3005.923822 | -3004.864479 | -3004.79788  | -3004.956887 | 30.2             |
|            | <b>W-L2<sup>Rh</sup>-TS10</b> | -3005.92531  | -3004.861961 | -3004.795216 | -3004.952692 | 32.8             |
|            | <b>W-L2<sup>Rh</sup>-16</b>   | -2950.638071 | -2949.58913  | -2949.523653 | -2949.677856 | -19.7            |
| <b>L3</b>  | <b>W-L3<sup>Rh</sup>-1'</b>   | -3298.679193 | -3297.778365 | -3297.716175 | -3297.870248 |                  |
|            | <b>W-L3<sup>Rh</sup>-TS8</b>  | -3301.015338 | -3300.077921 | -3300.01477  | -3300.173687 | 33.9             |
|            | <b>W-L3<sup>Rh</sup>-TS10</b> | -3301.006307 | -3300.066772 | -3300.002765 | -3300.161643 | 41.4             |
|            | <b>W-L3<sup>Rh</sup>-16</b>   | -3245.733261 | -3244.805347 | -3244.74327  | -3244.894875 | -16.1            |
| <b>L4</b>  | <b>W-L4<sup>Rh</sup>-1'</b>   | -4646.781917 | -4645.864704 | -4645.787789 | -4645.981044 |                  |
|            | <b>W-L4<sup>Rh</sup>-TS8</b>  | -4649.121122 | -4648.167621 | -4648.089693 | -4648.284719 | 33.7             |
|            | <b>W-L4<sup>Rh</sup>-TS10</b> | -4649.110386 | -4648.154906 | -4648.076041 | -4648.272839 | 41.2             |
|            | <b>W-L4<sup>Rh</sup>-16</b>   | -4593.836675 | -4592.893383 | -4592.81627  | -4593.006631 | -16.7            |
| <b>L5</b>  | <b>W-L5<sup>Rh</sup>-1'</b>   | -3695.619126 | -3694.750386 | -3694.684947 | -3694.846541 |                  |
|            | <b>W-L5<sup>Rh</sup>-TS8</b>  | -3697.954642 | -3697.050777 | -3696.983996 | -3697.15123  | 33.1             |
|            | <b>W-L5<sup>Rh</sup>-TS10</b> | -3697.945427 | -3697.038436 | -3696.971284 | -3697.137195 | 41.9             |
|            | <b>W-L5<sup>Rh</sup>-16</b>   | -3642.671041 | -3641.77812  | -3641.712446 | -3641.872648 | -17.0            |
| <b>L6</b>  | <b>W-L6<sup>Rh</sup>-1'</b>   | -3455.910815 | -3454.902788 | -3454.833951 | -3455.00451  |                  |
|            | <b>W-L6<sup>Rh</sup>-TS8</b>  | -3458.247606 | -3457.203876 | -3457.1332   | -3457.308307 | 33.6             |
|            | <b>W-L6<sup>Rh</sup>-TS10</b> | -3458.238635 | -3457.192709 | -3457.121244 | -3457.298193 | 40.0             |
|            | <b>W-L6<sup>Rh</sup>-16</b>   | -3402.964666 | -3401.930866 | -3401.860777 | -3402.033273 | -18.7            |
| <b>L7</b>  | <b>W-L7<sup>Rh</sup>-1'</b>   | -3770.333214 | -3769.107969 | -3769.02612  | -3769.220511 |                  |
|            | <b>W-L7<sup>Rh</sup>-TS8</b>  | -3772.665223 | -3771.405054 | -3771.321868 | -3771.519012 | 37.0             |
|            | <b>W-L7<sup>Rh</sup>-TS10</b> | -3772.675798 | -3771.410615 | -3771.328036 | -3771.522458 | 34.8             |
|            | <b>W-L7<sup>Rh</sup>-16</b>   | -3717.373635 | -3716.122897 | -3716.040492 | -3716.235259 | -9.9             |
| <b>L8</b>  | <b>W-L8<sup>Rh</sup>-1'</b>   | -3834.451297 | -3833.265588 | -3833.18509  | -3833.381038 |                  |
|            | <b>W-L8<sup>Rh</sup>-TS8</b>  | -3836.787641 | -3835.566236 | -3835.484618 | -3835.684    | 34.2             |
|            | <b>W-L8<sup>Rh</sup>-TS10</b> | -3836.780594 | -3835.55704  | -3835.474761 | -3835.674371 | 40.2             |
|            | <b>W-L8<sup>Rh</sup>-16</b>   | -3781.504828 | -3780.293341 | -3780.212276 | -3780.408317 | -17.8            |
| <b>L9</b>  | <b>W-L9<sup>Rh</sup>-1'</b>   | -3722.75853  | -3722.160343 | -3722.10177  | -3722.249529 |                  |
|            | <b>W-L9<sup>Rh</sup>-TS8</b>  | -3725.106069 | -3724.471319 | -3724.41193  | -3724.561511 | 28.5             |
|            | <b>W-L9<sup>Rh</sup>-TS10</b> | -3725.086132 | -3724.448493 | -3724.388115 | -3724.540765 | 41.5             |
|            | <b>W-L9<sup>Rh</sup>-16</b>   | -3669.816445 | -3669.189765 | -3669.131655 | -3669.275603 | -17.0            |
| <b>L10</b> | <b>W-L10<sup>Rh</sup>-1'</b>  | -2925.003056 | -2924.034458 | -2923.970853 | -2924.124567 |                  |

|            |                                |              |              |              |              |       |
|------------|--------------------------------|--------------|--------------|--------------|--------------|-------|
|            | <b>W-L10<sup>Rh</sup>-TS8</b>  | -2927.344065 | -2926.340713 | -2926.275728 | -2926.432867 | 30.8  |
|            | <b>W-L10<sup>Rh</sup>-TS10</b> | -2927.34149  | -2926.336111 | -2926.270143 | -2926.430426 | 32.4  |
|            | <b>W-L10<sup>Rh</sup>-16</b>   | -2872.057544 | -2871.065625 | -2871.001323 | -2871.156619 | -20.8 |
| <b>L11</b> | <b>W-L11<sup>Rh</sup>-1'</b>   | -3044.848991 | -3043.95056  | -3043.888706 | -3044.038853 |       |
|            | <b>W-L11<sup>Rh</sup>-TS8</b>  | -3047.190435 | -3046.257139 | -3046.193998 | -3046.346847 | 31.0  |
|            | <b>W-L11<sup>Rh</sup>-TS10</b> | -3047.186725 | -3046.251623 | -3046.187402 | -3046.344095 | 32.7  |
|            | <b>W-L11<sup>Rh</sup>-16</b>   | -2991.90331  | -2990.981031 | -2990.91874  | -2991.06924  | -19.7 |
| <b>L12</b> | <b>W-L12<sup>Rh</sup>-1'</b>   | -4725.398345 | -4724.42757  | -4724.34692  | -4724.546747 |       |
|            | <b>W-L12<sup>Rh</sup>-TS8</b>  | -4727.736779 | -4726.729703 | -4726.64811  | -4726.849959 | 34.0  |
|            | <b>W-L12<sup>Rh</sup>-TS10</b> | -4727.72717  | -4726.717856 | -4726.63542  | -4726.840885 | 39.7  |
|            | <b>W-L12<sup>Rh</sup>-16</b>   | -4672.452925 | -4671.456981 | -4671.376453 | -4671.574341 | -18.0 |

**Table S7** Computed energies (E), zero-point energy corrected energies ( $E_{zpe}$ ), enthalpies (H) and Gibbs free energies (G; all in Hartree) of the selected stationary points as shown in Table 2 of the main paper.

| Ligand     | Compd.                          | E            | $E_{zpe}$    | H            | G            | $\Delta G_{rel}$ |
|------------|---------------------------------|--------------|--------------|--------------|--------------|------------------|
|            | <b>H<sub>2</sub></b>            | -1.1829428   | -1.173025    | -1.16972     | -1.17871     |                  |
| <b>L1</b>  | <b>Mo-L1<sup>Rh</sup>-1'</b>    | -2847.490266 | -2846.574788 | -2846.515182 | -2846.659484 |                  |
|            | <b>Mo-L1<sup>Rh</sup>-TS8</b>   | -2849.826019 | -2848.876877 | -2848.815435 | -2848.965217 | 32.4             |
|            | <b>Mo-L1<sup>Rh</sup>-TS10</b>  | -2849.824887 | -2848.872202 | -2848.810237 | -2848.960775 | 35.2             |
|            | <b>Mo-L1<sup>Rh</sup>-16</b>    | -2794.539502 | -2793.600664 | -2793.540385 | -2793.68578  | -17.2            |
| <b>L2</b>  | <b>Mo-L2<sup>Rh</sup>-1'</b>    | -3004.689404 | -3003.663868 | -3003.598957 | -3003.751898 |                  |
|            | <b>Mo-L2<sup>Rh</sup>-TS8</b>   | -3007.023251 | -3005.963093 | -3005.896829 | -3006.054635 | 34.3             |
|            | <b>Mo-L2<sup>Rh</sup>-TS10</b>  | -3007.024487 | -3005.960861 | -3005.894277 | -3006.051392 | 36.3             |
|            | <b>Mo-L2<sup>Rh</sup>-16</b>    | -2951.736564 | -2950.687614 | -2950.622305 | -2950.775838 | -15.7            |
| <b>L10</b> | <b>Mo-L10<sup>Rh</sup>-1'</b>   | -2926.10634  | -2925.13728  | -2925.074035 | -2925.225866 |                  |
|            | <b>Mo-L10<sup>Rh</sup>-TS8</b>  | -2928.441718 | -2927.439731 | -2927.374379 | -2927.533714 | 31.1             |
|            | <b>Mo-L10<sup>Rh</sup>-TS10</b> | -2928.441323 | -2927.436097 | -2927.370125 | -2927.530334 | 33.2             |
|            | <b>Mo-L10<sup>Rh</sup>-16</b>   | -2873.155292 | -2872.163227 | -2872.099115 | -2872.254047 | -18.3            |
| <b>L11</b> | <b>Mo-L11<sup>Rh</sup>-1'</b>   | -3045.95249  | -3045.053768 | -3044.992284 | -3045.140229 |                  |
|            | <b>Mo-L11<sup>Rh</sup>-TS8</b>  | -3048.287909 | -3047.355849 | -3047.29233  | -3047.447648 | 31.4             |
|            | <b>Mo-L11<sup>Rh</sup>-TS10</b> | -3048.286547 | -3047.351298 | -3047.287147 | -3047.44338  | 34.1             |
|            | <b>Mo-L11<sup>Rh</sup>-16</b>   | -2993.000935 | -2992.079045 | -2992.01669  | -2992.168038 | -18.1            |

**Table S8** Computed energies (E), zero-point energy corrected energies ( $E_{zpe}$ ), enthalpies (H) and Gibbs free energies (G; all in Hartree) of the selected stationary points as shown in Table 3 of the main paper.

| Ligand     | Compd.                          | E            | $E_{zpe}$    | H            | G            | $\Delta G_{rel}$ |
|------------|---------------------------------|--------------|--------------|--------------|--------------|------------------|
|            | H <sub>2</sub>                  | -1.1829428   | -1.173025    | -1.16972     | -1.17871     |                  |
| <b>L1</b>  | <b>W-L1<sup>Ir</sup>-1'</b>     | -2840.188127 | -2839.272121 | -2839.21256  | -2839.357094 |                  |
|            | <b>W-L1<sup>Ir</sup>-TS8</b>    | -2842.53909  | -2841.591104 | -2841.529025 | -2841.679882 | 21.7             |
|            | <b>W-L1<sup>Ir</sup>-TS10</b>   | -2842.53484  | -2841.582015 | -2841.519774 | -2841.671863 | 26.8             |
|            | <b>W-L1<sup>Ir</sup>-16</b>     | -2787.251406 | -2786.311912 | -2786.251607 | -2786.397622 | -26.1            |
| <b>L10</b> | <b>W-L10<sup>Ir</sup>-1'</b>    | -2918.804114 | -2917.834735 | -2917.771504 | -2917.923604 |                  |
|            | <b>W-L10<sup>Ir</sup>-TS8</b>   | -2921.156742 | -2920.153053 | -2920.088314 | -2920.244932 | 22.6             |
|            | <b>W-L10<sup>Ir</sup>-TS10</b>  | -2921.151209 | -2920.145904 | -2920.079736 | -2920.240864 | 25.2             |
|            | <b>W-L10<sup>Ir</sup>-16</b>    | -2865.867277 | -2864.874248 | -2864.810324 | -2864.963863 | -25.9            |
| <b>L11</b> | <b>W-L11<sup>Ir</sup>-1'</b>    | -3038.650173 | -3037.751082 | -3037.689573 | -3037.838454 |                  |
|            | <b>W-L11<sup>Ir</sup>-TS8</b>   | -3041.003255 | -3040.069777 | -3040.006774 | -3040.159116 | 23.1             |
|            | <b>W-L11<sup>Ir</sup>-TS10</b>  | -3040.996456 | -3040.061443 | -3039.996999 | -3040.155898 | 25.1             |
|            | <b>W-L11<sup>Ir</sup>-16</b>    | -2985.713099 | -2984.790585 | -2984.728348 | -2984.878363 | -25.7            |
| <b>L1</b>  | <b>Mo-L1<sup>Ir</sup>-1'</b>    | -2841.291495 | -2840.376014 | -2840.316596 | -2840.459717 |                  |
|            | <b>Mo-L1<sup>Ir</sup>-TS8</b>   | -2843.639071 | -2842.68883  | -2842.627801 | -2842.775666 | 26.0             |
|            | <b>Mo-L1<sup>Ir</sup>-TS10</b>  | -2843.634622 | -2842.682093 | -2842.619863 | -2842.771654 | 28.5             |
|            | <b>Mo-L1<sup>Ir</sup>-16</b>    | -2788.348874 | -2787.409772 | -2787.349439 | -2787.494808 | -22.7            |
| <b>L10</b> | <b>Mo-L10<sup>Ir</sup>-1'</b>   | -2919.907406 | -2918.938222 | -2918.875153 | -2919.026161 |                  |
|            | <b>Mo-L10<sup>Ir</sup>-TS8</b>  | -2922.254475 | -2921.250958 | -2921.186142 | -2921.342674 | 25.7             |
|            | <b>Mo-L10<sup>Ir</sup>-TS10</b> | -2922.25106  | -2921.245577 | -2921.179557 | -2921.339973 | 27.4             |
|            | <b>Mo-L10<sup>Ir</sup>-16</b>   | -2866.964776 | -2865.972725 | -2865.909408 | -2866.060939 | -22.5            |
| <b>L11</b> | <b>Mo-L11<sup>Ir</sup>-1'</b>   | -3039.753677 | -3038.854822 | -3038.79355  | -3038.940584 |                  |
|            | <b>Mo-L11<sup>Ir</sup>-TS8</b>  | -3042.100921 | -3041.16762  | -3041.104564 | -3041.25725  | 25.6             |
|            | <b>Mo-L11<sup>Ir</sup>-TS10</b> | -3042.096277 | -3041.16104  | -3041.096752 | -3041.253531 | 27.9             |
|            | <b>Mo-L11<sup>Ir</sup>-16</b>   | -2986.810704 | -2985.887651 | -2985.825627 | -2985.976065 | -22.9            |

**Table S9** Computed energies (E), zero-point energy corrected energies ( $E_{zpe}$ ), enthalpies (H) and Gibbs free energies (G; all in Hartree) of the selected stationary points as shown in Table 4 of the main paper.

| Compd.                       | E            | $E_{zpe}$    | H            | G            | $\Delta G_{rel}$ |
|------------------------------|--------------|--------------|--------------|--------------|------------------|
| H <sub>2</sub>               | -1.1829428   | -1.173025    | -1.16972     | -1.17871     |                  |
| W-L1 <sup>Rh</sup> -Cl-1'    | -3765.78326  | -3764.880239 | -3764.816983 | -3764.969074 |                  |
| W-L1 <sup>Rh</sup> -Cl-TS8   | -3768.140359 | -3767.200083 | -3767.136176 | -3767.290512 | 22.6             |
| W-L1 <sup>Rh</sup> -Cl-TS10  | -3768.130229 | -3767.187721 | -3767.123034 | -3767.278201 | 30.3             |
| W-L1 <sup>Rh</sup> -Cl-16    | -3712.842879 | -3711.915733 | -3711.852015 | -3712.006503 | -24.1            |
| W-L1 <sup>Rh</sup> -N-1'     | -3064.259736 | -3063.342792 | -3063.278643 | -3063.432887 |                  |
| W-L1 <sup>Rh</sup> -N-TS8    | -3066.568234 | -3065.615448 | -3065.550492 | -3065.706627 | 52.5             |
| W-L1 <sup>Rh</sup> -N-TS10   | -3066.582506 | -3065.625735 | -3065.560378 | -3065.716477 | 46.3             |
| W-L1 <sup>Rh</sup> -N-16     | -3011.310373 | -3010.368817 | -3010.304432 | -3010.459481 | -17.3            |
| Mo-L1 <sup>Rh</sup> -Cl-1'   | -3766.888699 | -3765.985102 | -3765.922034 | -3766.07328  |                  |
| Mo-L1 <sup>Rh</sup> -Cl-TS8  | -3769.243263 | -3768.303706 | -3768.239484 | -3768.396484 | 21.5             |
| Mo-L1 <sup>Rh</sup> -Cl-TS10 | -3769.232485 | -3768.289661 | -3768.225122 | -3768.380055 | 31.8             |
| Mo-L1 <sup>Rh</sup> -Cl-16   | -3713.942436 | -3713.015371 | -3712.951667 | -3713.10597  | -21.2            |
| Mo-L1 <sup>Rh</sup> -N-1'    | -3065.369032 | -3064.452066 | -3064.387886 | -3064.542124 |                  |
| Mo-L1 <sup>Rh</sup> -N-TS8   | -3067.674078 | -3066.721177 | -3066.656272 | -3066.812113 | 54.9             |
| Mo-L1 <sup>Rh</sup> -N-TS10  | -3067.68746  | -3066.73105  | -3066.665461 | -3066.823105 | 48.0             |
| Mo-L1 <sup>Rh</sup> -N-16    | -3012.412026 | -3011.470323 | -3011.406751 | -3011.560133 | -12.0            |

**Table S10** Computed energies (E), zero-point energy corrected energies ( $E_{zpe}$ ), enthalpies (H) and Gibbs free energies (G; all in Hartree) of the selected intermediates and transition states at various DFT levels for the catalytic system W-L1<sup>Rh</sup> as shown in Fig. S1.

| Functional       | Compd.          | E            | $E_{zpe}$    | H            | G            | $\Delta G_{rel}$ |
|------------------|-----------------|--------------|--------------|--------------|--------------|------------------|
| <b>B97D3-BJ</b>  | H <sub>2</sub>  | -1.1829428   | -1.173025    | -1.16972     | -1.17871     |                  |
|                  | N <sub>2</sub>  | -109.4988745 | -109.493463  | -109.490158  | -109.506089  |                  |
|                  | NH <sub>3</sub> | -56.5583513  | -56.524939   | -56.521127   | -56.537173   |                  |
|                  | 1'              | -2846.386837 | -2845.471761 | -2845.41274  | -2845.555253 |                  |
|                  | TS8             | -2848.728621 | -2847.778916 | -2847.717604 | -2847.866303 | 29.1             |
|                  | TS10            | -2848.7251   | -2847.772405 | -2847.710254 | -2847.86233  | 31.6             |
| <b>PBE0-D3BJ</b> | 16              | -2793.442194 | -2792.502906 | -2792.442712 | -2792.587681 | -21.0            |
|                  | H <sub>2</sub>  | -1.1678393   | -1.15782     | -1.154515    | -1.163506    |                  |
|                  | N <sub>2</sub>  | -109.4414902 | -109.435822  | -109.432517  | -109.448431  |                  |
|                  | NH <sub>3</sub> | -56.5199943  | -56.48578    | -56.481969   | -56.498      |                  |
|                  | 1'              | -2844.658062 | -2843.720118 | -2843.661867 | -2843.803859 |                  |
|                  | TS8             | -2846.997635 | -2846.023456 | -2845.963818 | -2846.108822 | 13.8             |
| TS10             | -2846.979586    | -2846.004216 | -2845.943159 | -2846.093963 | 23.2         |                  |



|                   |                       |              |              |              |              |       |
|-------------------|-----------------------|--------------|--------------|--------------|--------------|-------|
|                   | <b>16</b>             | -2791.742675 | -2790.780595 | -2790.722518 | -2790.863101 | -41.9 |
| <b>B3LYP-D3BJ</b> | <b>H<sub>2</sub></b>  | -1.1793413   | -1.169313    | -1.166009    | -1.174995    |       |
|                   | <b>N<sub>2</sub></b>  | -109.5689086 | -109.563311  | -109.560007  | -109.575924  |       |
|                   | <b>NH<sub>3</sub></b> | -56.5931105  | -56.559181   | -56.55537    | -56.571403   |       |
|                   | <b>1'</b>             | -2847.539988 | -2846.604596 | -2846.546559 | -2846.68604  |       |
|                   | <b>TS8</b>            | -2849.886395 | -2848.916027 | -2848.856141 | -2849.001502 | 21.7  |
|                   | <b>TS10</b>           | -2849.875706 | -2848.903492 | -2848.842419 | -2848.992275 | 27.5  |
|                   | <b>16</b>             | -2794.571007 | -2793.612345 | -2793.553159 | -2793.696667 | -35.8 |
| <b>M06-L</b>      | <b>H<sub>2</sub></b>  | -1.1712078   | -1.161368    | -1.158063    | -1.16705     |       |
|                   | <b>N<sub>2</sub></b>  | -109.5531235 | -109.547591  | -109.544286  | -109.56021   |       |
|                   | <b>NH<sub>3</sub></b> | -56.5753594  | -56.541065   | -56.537259   | -56.55328    |       |
|                   | <b>1'</b>             | -2847.001742 | -2846.065588 | -2846.007314 | -2846.14751  |       |
|                   | <b>TS8</b>            | -2849.319248 | -2848.347967 | -2848.287816 | -2848.434594 | 29.5  |
|                   | <b>TS10</b>           | -2849.310896 | -2848.335607 | -2848.275191 | -2848.422593 | 37.0  |
|                   | <b>16</b>             | -2794.016859 | -2793.055826 | -2792.997185 | -2793.138331 | -27.0 |

**Table S11** Computed energies (E), zero-point energy corrected energies ( $E_{zpe}$ ), enthalpies (H) and Gibbs free energies (G; all in Hartree) of the different stationary points involved in the direct hydrogenation of  $N_2$  to  $NH_3$  utilizing the catalysts  $W-L4^{Rh}$  and  $W-L7^{Rh}$  as shown in Fig. S3.

| Compd.                        | E            | $E_{zpe}$    | H            | G            | $\Delta G_{rel}$ |
|-------------------------------|--------------|--------------|--------------|--------------|------------------|
| <b>H<sub>2</sub></b>          | -1.1829428   | -1.173025    | -1.16972     | -1.17871     |                  |
| <b>N<sub>2</sub></b>          | -109.4988745 | -109.493463  | -109.490158  | -109.506089  |                  |
| <b>NH<sub>3</sub></b>         | -56.5583513  | -56.524939   | -56.521127   | -56.537173   |                  |
| <b>W-L4<sup>Rh</sup>-1'</b>   | -4646.781917 | -4645.864704 | -4645.787789 | -4645.981044 | 0.0              |
| <b>W-L4<sup>Rh</sup>-2</b>    | -4647.949913 | -4647.018583 | -4646.940337 | -4647.133588 | 16.4             |
| <b>W-L4<sup>Rh</sup>-TS3</b>  | -4647.934427 | -4647.005168 | -4646.927505 | -4647.120948 | 24.4             |
| <b>W-L4<sup>Rh</sup>-4</b>    | -4647.954941 | -4647.019704 | -4646.941508 | -4647.137275 | 14.1             |
| <b>W-L4<sup>Rh</sup>-TS5</b>  | -4647.926759 | -4646.994641 | -4646.916847 | -4647.112823 | 29.4             |
| <b>W-L4<sup>Rh</sup>-6</b>    | -4647.957636 | -4647.019626 | -4646.941783 | -4647.135998 | 14.9             |
| <b>W-L4<sup>Rh</sup>-7</b>    | -4649.133127 | -4648.180404 | -4648.101133 | -4648.298458 | 25.1             |
| <b>W-L4<sup>Rh</sup>-TS8</b>  | -4649.121122 | -4648.167621 | -4648.089693 | -4648.284719 | 33.7             |
| <b>W-L4<sup>Rh</sup>-9</b>    | -4649.131648 | -4648.173503 | -4648.095773 | -4648.290821 | 29.9             |
| <b>W-L4<sup>Rh</sup>-TS10</b> | -4649.110386 | -4648.154906 | -4648.076041 | -4648.272839 | 41.2             |
| <b>W-L4<sup>Rh</sup>-11</b>   | -4592.612327 | -4591.694329 | -4591.6196   | -4591.807049 | -3.6             |
| <b>W-L4<sup>Rh</sup>-TS12</b> | -4592.584646 | -4591.662857 | -4591.58689  | -4591.776661 | 15.5             |
| <b>W-L4<sup>Rh</sup>-13</b>   | -4592.635839 | -4591.714058 | -4591.637623 | -4591.82646  | -15.8            |
| <b>W-L4<sup>Rh</sup>-14</b>   | -4593.803194 | -4592.865146 | -4592.787608 | -4592.981282 | -0.8             |

|                               |              |              |              |              |       |
|-------------------------------|--------------|--------------|--------------|--------------|-------|
| <b>W-L4<sup>Rh</sup>-TS15</b> | -4593.796519 | -4592.862728 | -4592.785155 | -4592.978593 | 0.9   |
| <b>W-L4<sup>Rh</sup>-16</b>   | -4593.836675 | -4592.893383 | -4592.81627  | -4593.006631 | -16.7 |
| <b>W-L4<sup>Rh</sup>-TS17</b> | -4593.807907 | -4592.8685   | -4592.791581 | -4592.98465  | -2.9  |
| <b>W-L4<sup>Rh</sup>-18</b>   | -4593.816565 | -4592.870848 | -4592.79378  | -4592.986078 | -3.8  |
| <b>W-L7<sup>Rh</sup>-1'</b>   | -3770.333214 | -3769.107969 | -3769.02612  | -3769.220511 | 0.0   |
| <b>W-L7<sup>Rh</sup>-2</b>    | -3771.498424 | -3770.256602 | -3770.173773 | -3770.369793 | 18.5  |
| <b>W-L7<sup>Rh</sup>-TS3</b>  | -3771.492505 | -3770.252977 | -3770.170751 | -3770.365768 | 21.0  |
| <b>W-L7<sup>Rh</sup>-4</b>    | -3771.512552 | -3770.267744 | -3770.185071 | -3770.382435 | 10.5  |
| <b>W-L7<sup>Rh</sup>-TS5</b>  | -3771.498454 | -3770.256737 | -3770.174528 | -3770.368643 | 19.2  |
| <b>W-L7<sup>Rh</sup>-6</b>    | -3771.501169 | -3770.254947 | -3770.172179 | -3770.368282 | 19.4  |
| <b>W-L7<sup>Rh</sup>-7</b>    | -3772.668931 | -3771.404985 | -3771.321884 | -3771.522402 | 34.8  |
| <b>W-L7<sup>Rh</sup>-TS8</b>  | -3772.665223 | -3771.405054 | -3771.321868 | -3771.519012 | 37.0  |
| <b>W-L7<sup>Rh</sup>-9</b>    | -3772.676993 | -3771.409924 | -3771.326744 | -3771.522886 | 34.5  |
| <b>W-L7<sup>Rh</sup>-TS10</b> | -3772.675798 | -3771.410615 | -3771.328036 | -3771.522458 | 34.8  |
| <b>W-L7<sup>Rh</sup>-11</b>   | -3716.178913 | -3714.948921 | -3714.867946 | -3715.061194 | -12.8 |
| <b>W-L7<sup>Rh</sup>-TS12</b> | -3716.159214 | -3714.932403 | -3714.852219 | -3715.040816 | 0.0   |
| <b>W-L7<sup>Rh</sup>-13</b>   | -3716.1627   | -3714.932475 | -3714.85181  | -3715.042048 | -0.8  |
| <b>W-L7<sup>Rh</sup>-14</b>   | -3717.342014 | -3716.096157 | -3716.013672 | -3716.208072 | 7.2   |
| <b>W-L7<sup>Rh</sup>-TS15</b> | -3717.33759  | -3716.093068 | -3716.011606 | -3716.204221 | 9.6   |
| <b>W-L7<sup>Rh</sup>-16</b>   | -3717.373635 | -3716.122897 | -3716.040492 | -3716.235259 | -9.9  |
| <b>W-L7<sup>Rh</sup>-TS17</b> | -3717.357124 | -3716.104625 | -3716.024679 | -3716.212305 | 4.5   |
| <b>W-L7<sup>Rh</sup>-18</b>   | -3717.36886  | -3716.113669 | -3716.031863 | -3716.224646 | -3.2  |

**Table S12** Computed energies (E), zero-point energy corrected energies ( $E_{zpe}$ ), enthalpies (H) and Gibbs free energies (G; all in Hartree) of various end-on ( $Ln-1^E$ ) and side-on ( $Ln-1^S$ )  $N_2$  coordinated molybdenum pincer complexes, as shown in Fig. S4.

| Compd.                   | E            | $E_{zpe}$    | H            | G            | $\Delta G_{rel}$ |
|--------------------------|--------------|--------------|--------------|--------------|------------------|
| <b>L1-1<sup>E</sup></b>  | -1868.079346 | -1867.542363 | -1867.507048 | -1867.599249 |                  |
| <b>L1-1<sup>S</sup></b>  | -1868.050935 | -1867.514098 | -1867.478771 | -1867.569936 | 18.4             |
| <b>L2-1<sup>E</sup></b>  | -2025.275301 | -2024.627885 | -2024.587533 | -2024.687747 |                  |
| <b>L2-1<sup>S</sup></b>  | -2025.259168 | -2024.612389 | -2024.572057 | -2024.671947 | 9.9              |
| <b>L10-1<sup>E</sup></b> | -1946.694587 | -1946.104061 | -1946.065018 | -1946.165633 |                  |
| <b>L10-1<sup>S</sup></b> | -1946.665747 | -1946.075799 | -1946.036682 | -1946.136283 | 18.4             |
| <b>L11-1<sup>E</sup></b> | -2066.542206 | -2066.022009 | -2065.984735 | -2066.081441 |                  |
| <b>L11-1<sup>S</sup></b> | -2066.513411 | -2065.994716 | -2065.956925 | -2066.05513  | 16.5             |

**Table S13** Computed energies (E), zero-point energy corrected energies ( $E_{zpe}$ ), enthalpies (H) and Gibbs free energies (G; all in Hartree) of the different stationary points involved in the direct hydrogenation of  $N_2$  to  $NH_3$  utilizing the catalyst **Mo-L1<sup>Rh</sup>**, as shown in Fig. S5.

| Compd.                         | E            | $E_{zpe}$    | H            | G            | $\Delta G_{rel}$ |
|--------------------------------|--------------|--------------|--------------|--------------|------------------|
| <b>H<sub>2</sub></b>           | -1.1829428   | -1.173025    | -1.16972     | -1.17871     |                  |
| <b>N<sub>2</sub></b>           | -109.4988745 | -109.493463  | -109.490158  | -109.506089  |                  |
| <b>NH<sub>3</sub></b>          | -56.5583513  | -56.524939   | -56.521127   | -56.537173   |                  |
| <b>Mo-L1<sup>Rh</sup>-1'</b>   | -2847.490266 | -2846.574788 | -2846.515182 | -2846.659484 | 0.0              |
| <b>Mo-L1<sup>Rh</sup>-2</b>    | -2848.664467 | -2847.734136 | -2847.673127 | -2847.82087  | 10.9             |
| <b>Mo-L1<sup>Rh</sup>-TS3</b>  | -2848.655929 | -2847.728443 | -2847.667852 | -2847.815401 | 14.3             |
| <b>Mo-L1<sup>Rh</sup>-4</b>    | -2848.673244 | -2847.740827 | -2847.679824 | -2847.827435 | 6.8              |
| <b>Mo-L1<sup>Rh</sup>-TS5</b>  | -2848.648083 | -2847.71954  | -2847.658305 | -2847.808286 | 18.8             |
| <b>Mo-L1<sup>Rh</sup>-6</b>    | -2848.665939 | -2847.728288 | -2847.667953 | -2847.814231 | 15.0             |
| <b>Mo-L1<sup>Rh</sup>-7</b>    | -2849.835487 | -2848.884156 | -2848.823021 | -2848.970263 | 29.3             |
| <b>Mo-L1<sup>Rh</sup>-TS8</b>  | -2849.826019 | -2848.876877 | -2848.815435 | -2848.965217 | 32.4             |
| <b>Mo-L1<sup>Rh</sup>-9</b>    | -2849.837721 | -2848.883164 | -2848.820961 | -2848.972987 | 27.6             |
| <b>Mo-L1<sup>Rh</sup>-TS10</b> | -2849.824887 | -2848.872202 | -2848.810237 | -2848.960775 | 35.2             |
| <b>Mo-L1<sup>Rh</sup>-11</b>   | -2793.32335  | -2792.405941 | -2792.346001 | -2792.492837 | -8.2             |
| <b>Mo-L1<sup>Rh</sup>-TS12</b> | -2793.310872 | -2792.398232 | -2792.338645 | -2792.483432 | -2.3             |
| <b>Mo-L1<sup>Rh</sup>-13</b>   | -2793.315812 | -2792.399164 | -2792.339398 | -2792.485446 | -3.6             |
| <b>Mo-L1<sup>Rh</sup>-14</b>   | -2794.507258 | -2793.573323 | -2793.512481 | -2793.6608   | -1.5             |
| <b>Mo-L1<sup>Rh</sup>-TS15</b> | -2794.503792 | -2793.572287 | -2793.512021 | -2793.658035 | 0.3              |
| <b>Mo-L1<sup>Rh</sup>-16</b>   | -2794.539502 | -2793.600664 | -2793.540385 | -2793.68578  | -17.2            |
| <b>Mo-L1<sup>Rh</sup>-TS17</b> | -2794.523537 | -2793.586588 | -2793.526572 | -2793.672271 | -8.7             |
| <b>Mo-L1<sup>Rh</sup>-18</b>   | -2794.530102 | -2793.586995 | -2793.527062 | -2793.671583 | -8.2             |

**Table S14** Computed energies (E), zero-point energy corrected energies ( $E_{zpe}$ ), enthalpies (H) and Gibbs free energies (G; all in Hartree) of the selected stationary points at different spin states, as shown in Fig. S6.

| Metal    | Compd.                | E            | $E_{zpe}$   | H           | G           | $\Delta G_{rel}$ |
|----------|-----------------------|--------------|-------------|-------------|-------------|------------------|
| <b>W</b> | <b>1<sup>1</sup></b>  | -1866.972491 | -1866.43535 | -1866.39992 | -1866.49321 | 0.0              |
|          | <b>3<sup>1</sup></b>  | -1866.959284 | -1866.42528 | -1866.38894 | -1866.48541 | 4.9              |
|          | <b>5<sup>1</sup></b>  | -1866.924728 | -1866.39447 | -1866.35755 | -1866.45556 | 23.6             |
|          | <b>1<sup>1'</sup></b> | -2846.386837 | -2845.47176 | -2845.41274 | -2845.55525 | 0.0              |
|          | <b>3<sup>1'</sup></b> | -2846.373239 | -2845.46235 | -2845.40143 | -2845.55016 | 3.2              |
|          | <b>5<sup>1'</sup></b> | -2846.343269 | -2845.43343 | -2845.37134 | -2845.52838 | 16.9             |
|          | <b>1<sup>2</sup></b>  | -2847.558247 | -2846.62769 | -2846.56673 | -2846.71422 | 0.0              |
|          | <b>3<sup>2</sup></b>  | -2847.545229 | -2846.61697 | -2846.55545 | -2846.70527 | 5.6              |

|           |                 |              |             |             |             |      |
|-----------|-----------------|--------------|-------------|-------------|-------------|------|
|           | <sup>5</sup> 2  | -2847.532547 | -2846.60788 | -2846.5456  | -2846.69857 | 9.8  |
| <b>Mo</b> | <sup>1</sup> 1  | -1868.079346 | -1867.54236 | -1867.50705 | -1867.59925 | 0.0  |
|           | <sup>3</sup> 1  | -1868.063446 | -1867.52909 | -1867.49298 | -1867.58872 | 6.6  |
|           | <sup>5</sup> 1  | -1868.025143 | -1867.49559 | -1867.45856 | -1867.55636 | 26.9 |
|           | <sup>1</sup> 1' | -2847.490266 | -2846.57479 | -2846.51518 | -2846.65948 | 0.0  |
|           | <sup>3</sup> 1' | -2847.473059 | -2846.56246 | -2846.50136 | -2846.6517  | 4.9  |
|           | <sup>5</sup> 1' | -2847.4449   | -2846.53476 | -2846.47323 | -2846.62536 | 21.4 |
|           | <sup>1</sup> 2  | -2848.664467 | -2847.73414 | -2847.67313 | -2847.82087 | 0.0  |
|           | <sup>3</sup> 2  | -2848.649089 | -2847.72078 | -2847.65943 | -2847.8082  | 8.0  |
|           | <sup>5</sup> 2  | -2848.63357  | -2847.70922 | -2847.64619 | -2847.80055 | 12.7 |

**Table S15** Computed energies (E), zero-point energy corrected energies ( $E_{zpe}$ ), enthalpies (H) and Gibbs free energies (G; all in Hartree) of selected stationary points with tungsten/molybdenum complexes containing the ligand **L1** in two different solvents, as shown in Table S1.

| Functional              | Compd.                         | E            | $E_{zpe}$    | H            | G            | $\Delta G_{rel}$ |
|-------------------------|--------------------------------|--------------|--------------|--------------|--------------|------------------|
| <b>CH<sub>3</sub>CN</b> | <b>H<sub>2</sub></b>           | -1.1829428   | -1.173025    | -1.16972     | -1.17871     |                  |
|                         | <b>N<sub>2</sub></b>           | -109.4988745 | -109.493463  | -109.490158  | -109.506089  |                  |
|                         | <b>NH<sub>3</sub></b>          | -56.5583513  | -56.524939   | -56.521127   | -56.537173   |                  |
|                         | <b>W-L1<sup>Rh</sup>-1'</b>    | -2846.386837 | -2845.471761 | -2845.41274  | -2845.555253 |                  |
|                         | <b>W-L1<sup>Rh</sup>-TS8</b>   | -2848.728621 | -2847.778916 | -2847.717604 | -2847.866303 | 29.1             |
|                         | <b>W-L1<sup>Rh</sup>-TS10</b>  | -2848.7251   | -2847.772405 | -2847.710254 | -2847.86233  | 31.6             |
|                         | <b>W-L1<sup>Rh</sup>-16</b>    | -2793.442194 | -2792.502906 | -2792.442712 | -2792.587681 | -21.0            |
| <b>DMSO</b>             | <b>H<sub>2</sub></b>           | -1.1824929   | -1.172575    | -1.16927     | -1.178557    |                  |
|                         | <b>N<sub>2</sub></b>           | -109.4979483 | -109.492537  | -109.489232  | -109.505459  |                  |
|                         | <b>NH<sub>3</sub></b>          | -56.5576715  | -56.524258   | -56.520447   | -56.536789   |                  |
|                         | <b>W-L1<sup>Rh</sup>-1'</b>    | -2846.374401 | -2845.458768 | -2845.399014 | -2845.544197 |                  |
|                         | <b>W-L1<sup>Rh</sup>-TS8</b>   | -2848.715726 | -2847.765909 | -2847.704616 | -2847.853335 | 30.1             |
|                         | <b>W-L1<sup>Rh</sup>-TS10</b>  | -2848.712079 | -2847.759047 | -2847.697014 | -2847.848318 | 33.3             |
|                         | <b>W-L1<sup>Rh</sup>-16</b>    | -2793.429998 | -2792.490213 | -2792.430179 | -2792.57471  | -19.8            |
| <b>CH<sub>3</sub>CN</b> | <b>Mo-L1<sup>Rh</sup>-1'</b>   | -2847.490266 | -2846.574788 | -2846.515182 | -2846.659484 |                  |
|                         | <b>Mo-L1<sup>Rh</sup>-TS8</b>  | -2849.826019 | -2848.876877 | -2848.815435 | -2848.965217 | 32.4             |
|                         | <b>Mo-L1<sup>Rh</sup>-TS10</b> | -2849.824887 | -2848.872202 | -2848.810237 | -2848.960775 | 35.2             |
|                         | <b>Mo-L1<sup>Rh</sup>-16</b>   | -2794.539502 | -2793.600664 | -2793.540385 | -2793.68578  | -17.2            |
| <b>DMSO</b>             | <b>Mo-L1<sup>Rh</sup>-1'</b>   | -2847.477692 | -2846.561795 | -2846.502319 | -2846.647927 |                  |
|                         | <b>Mo-L1<sup>Rh</sup>-TS8</b>  | -2849.813123 | -2848.86354  | -2848.802299 | -2848.951066 | 33.9             |
|                         | <b>Mo-L1<sup>Rh</sup>-TS10</b> | -2849.811946 | -2848.859383 | -2848.797362 | -2848.948356 | 35.6             |
|                         | <b>Mo-L1<sup>Rh</sup>-16</b>   | -2794.527277 | -2793.587954 | -2793.52773  | -2793.673515 | -16.8            |

**Table S16** Computed energies (E), zero-point energy corrected energies ( $E_{zpe}$ ), enthalpies (H) and Gibbs free energies (G; all in Hartree) of the stationary points involved in the dimerization reaction ( $1 \rightarrow 1^{di}$ ), as shown in Fig. S6.

| Ligand        | Compd.                | E            | $E_{zpe}$   | H           | G           | $\Delta G_{rel}$ |
|---------------|-----------------------|--------------|-------------|-------------|-------------|------------------|
| <b>W-L1</b>   | <b>1</b>              | -1866.972491 | -1866.43535 | -1866.39992 | -1866.49321 |                  |
|               | <b>1<sup>di</sup></b> | -3733.886041 | -3732.81377 | -3732.74138 | -3732.91472 | 45.0             |
| <b>W-L10</b>  | <b>1</b>              | -1945.5877   | -1944.99699 | -1944.95789 | -1945.05938 |                  |
|               | <b>1<sup>di</sup></b> | -3891.116938 | -3889.93799 | -3889.85811 | -3890.04787 | 44.5             |
| <b>W-L11</b>  | <b>1</b>              | -2065.43536  | -2064.91496 | -2064.87759 | -2064.97522 |                  |
|               | <b>1<sup>di</sup></b> | -4130.810109 | -4129.77139 | -4129.6951  | -4129.87746 | 45.8             |
| <b>Mo-L1</b>  | <b>1</b>              | -1868.079346 | -1867.54236 | -1867.50705 | -1867.59925 |                  |
|               | <b>1<sup>di</sup></b> | -3736.084618 | -3735.01221 | -3734.94034 | -3735.1104  | 55.3             |
| <b>Mo-L10</b> | <b>1</b>              | -1946.694587 | -1946.10406 | -1946.06502 | -1946.16563 |                  |
|               | <b>1<sup>di</sup></b> | -3893.315723 | -3892.1362  | -3892.05702 | -3892.24294 | 55.4             |
| <b>Mo-L11</b> | <b>1</b>              | -2066.542206 | -2066.02201 | -2065.98474 | -2066.08144 |                  |
|               | <b>1<sup>di</sup></b> | -4133.008779 | -4131.96972 | -4131.89405 | -4132.07255 | 56.7             |

**Table S17** Computed energies (E), zero-point energy corrected energies ( $E_{zpe}$ ), enthalpies (H) and Gibbs free energies (G; all in Hartree) of the stationary points involved in the dimerization reaction ( $1 \rightarrow 2^{di}$ ), as shown in Fig. S7.

| Ligand        | Compd.                | E            | $E_{zpe}$   | H           | G           | $\Delta G_{rel}$ |
|---------------|-----------------------|--------------|-------------|-------------|-------------|------------------|
|               | <b>N<sub>2</sub></b>  | -109.4988745 | -109.493463 | -109.490158 | -109.506089 |                  |
| <b>W-L1</b>   | <b>1</b>              | -1866.972491 | -1866.43535 | -1866.39992 | -1866.49321 |                  |
|               | <b>2<sup>di</sup></b> | -3624.467537 | -3623.40409 | -3623.33375 | -3623.50211 | -13.7            |
| <b>W-L10</b>  | <b>1</b>              | -1945.5877   | -1944.99699 | -1944.95789 | -1945.05938 |                  |
|               | <b>2<sup>di</sup></b> | -3781.698435 | -3780.52821 | -3780.45053 | -3780.63472 | -13.8            |
| <b>W-L11</b>  | <b>1</b>              | -2065.43536  | -2064.91496 | -2064.87759 | -2064.97522 |                  |
|               | <b>2<sup>di</sup></b> | -4021.392291 | -4020.36233 | -4020.28815 | -4020.46494 | -12.9            |
| <b>Mo-L1</b>  | <b>1</b>              | -1868.079346 | -1867.54236 | -1867.50705 | -1867.59925 |                  |
|               | <b>2<sup>di</sup></b> | -3626.668953 | -3625.60436 | -3625.53464 | -3625.70205 | -6.1             |
| <b>Mo-L10</b> | <b>1</b>              | -1946.694587 | -1946.10406 | -1946.06502 | -1946.16563 |                  |
|               | <b>2<sup>di</sup></b> | -3783.8997   | -3782.72835 | -3782.65117 | -3782.83351 | -5.2             |
| <b>Mo-L11</b> | <b>1</b>              | -2066.542206 | -2066.02201 | -2065.98474 | -2066.08144 |                  |
|               | <b>2<sup>di</sup></b> | -4023.593836 | -4022.56427 | -4022.491   | -4022.66427 | -4.7             |

**Table S18** Computed energies (E), zero-point energy corrected energies ( $E_{zpe}$ ), enthalpies (H) and Gibbs free energies (G; all in Hartree) of the selected stationary points, as shown in Fig. S8.

| Ligand                  | Compd.                  | E            | $E_{zpe}$    | H            | G            | $\Delta G_{rel}$ |
|-------------------------|-------------------------|--------------|--------------|--------------|--------------|------------------|
|                         | <b>H<sub>2</sub></b>    | -1.1829428   | -1.173025    | -1.16972     | -1.17871     |                  |
| <b>W-L1</b>             | <b>1'</b>               | -2846.386837 | -2845.471761 | -2845.41274  | -2845.55525  | 0.0              |
|                         | <b>2</b>                | -2847.558247 | -2846.627689 | -2846.566725 | -2846.71422  | 12.4             |
|                         | <b>TS3</b>              | -2847.552404 | -2846.62469  | -2846.564181 | -2846.71168  | 14.0             |
|                         | <b>4</b>                | -2847.574311 | -2846.641092 | -2846.579944 | -2846.72904  | 3.1              |
|                         | <b>1<sup>H2</sup></b>   | -2847.574874 | -2846.645305 | -2846.584567 | -2846.731536 | 1.5              |
|                         | <b>2<sup>H2</sup></b>   | -2848.762995 | -2847.817474 | -2847.755599 | -2847.904948 | 4.8              |
|                         | <b>TS3<sup>H2</sup></b> | -2848.739477 | -2847.79783  | -2847.73631  | -2847.885947 | 16.8             |
|                         | <b>4<sup>H2</sup></b>   | -2848.743103 | -2847.797163 | -2847.73499  | -2847.887203 | 16.0             |
|                         | <b>Mo-L1</b>            | <b>1'</b>    | -2847.490266 | -2846.574788 | -2846.515182 | -2846.65948      |
| <b>2</b>                |                         | -2848.664467 | -2847.734136 | -2847.673127 | -2847.82087  | 10.9             |
| <b>TS3</b>              |                         | -2848.655929 | -2847.728443 | -2847.667852 | -2847.8154   | 14.3             |
| <b>4</b>                |                         | -2848.673244 | -2847.740827 | -2847.679824 | -2847.82744  | 6.8              |
| <b>1<sup>H2</sup></b>   |                         | -2848.66988  | -2847.74033  | -2847.679808 | -2847.826104 | 7.6              |
| <b>2<sup>H2</sup></b>   |                         | -2849.859854 | -2848.915094 | -2848.853146 | -2849.00236  | 9.1              |
| <b>TS3<sup>H2</sup></b> |                         | -2849.832196 | -2848.890766 | -2848.829209 | -2848.979554 | 23.0             |
| <b>4<sup>H2</sup></b>   |                         | -2849.833913 | -2848.888016 | -2848.826299 | -2848.975316 | 26.1             |

## 10 Literature

- 1 M. J. Frisch, G. W. Trucks, H. B. Schlegel, G. E. Scuseria, M. A. Robb, J. R. Cheeseman, G. Scalmani, V. Barone, G. A. Petersson, H. Nakatsuji, X. Li, M. Caricato, A. V. Marenich, J. Bloino, B. G. Janesko, R. Gomperts, B. Mennucci, H. P. Hratchian, J. V. Ortiz, A. F. Izmaylov, J. L. Sonnenberg, D. Williams-Young, F. Ding, F. Lipparini, F. Egidi, J. Goings, B. Peng, A. Petrone, T. Henderson, D. Ranasinghe, V. G. Zakrzewski, J. Gao, N. Rega, G. Zheng, W. Liang, M. Hada, M. Ehara, K. Toyota, R. Fukuda, J. Hasegawa, M. Ishida, T. Nakajima, Y. Honda, O. Kitao, H. Nakai, T. Vreven, K. Throssell, J. A. Montgomery, Jr., J. E. Peralta, F. Ogliaro, M. J. Bearpark, J. J. Heyd, E. N. Brothers, K. N. Kudin, V. N. Staroverov, T. A. Keith, R. Kobayashi, J. Normand, K.

- Raghavachari, A. P. Rendell, J. C. Burant, S. S. Iyengar, J. Tomasi, M. Cossi, J. M. Millam, M. Klene, C. Adamo, R. Cammi, J. W. Ochterski, R. L. Martin, K. Morokuma, O. Farkas, J. B. Foresman, and D. J. Fox, Gaussian 16, Revision B.01., Wallingford CT, 2016.
- 2 A. V Marenich, C. J. Cramer and D. G. Truhlar, *J. Phys. Chem. B*, 2009, **113**, 6378–6396.
- 3 A. D. Becke, *J. Chem. Phys.*, 1997, **107**, 8554–8560.
- 4 S. Grimme, *J. Comput. Chem.*, 2006, **27**, 1787–1799.
- 5 S. Grimme, J. Antony, S. Ehrlich and H. Krieg, *J. Chem. Phys.*, 2010, **132**, 154104.
- 6 S. Grimme, S. Ehrlich and L. Goerigk, *J. Comput. Chem.*, 2011, **32**, 1456–1465.
- 7 A. Schäfer, C. Huber and R. Ahlrichs, *J. Chem. Phys.*, 1994, **100**, 5829–5835.
- 8 A. Schäfer, H. Horn and R. Ahlrichs, *J. Chem. Phys.*, 1992, **97**, 2571–2577.
- 9 F. Weigend and R. Ahlrichs, *Phys. Chem. Chem. Phys.*, 2005, **7**, 3297–3305.
- 10 D. Andrae, U. Haeussermann, M. Dolg, H. Stoll and H. Preuss, *Theor. Chim. Acta*, 1990, **77**, 123–141.
- 11 A. D. Becke, *J. Chem. Phys.*, 1992, **96**, 2155–2160.
- 12 J. P. Perdew, K. Burke and M. Ernzerhof, *Phys. Rev. Lett.*, 1996, **77**, 3865.
- 13 P. J. Stephens, F. J. Devlin, C. F. Chabalowski and M. J. Frisch, *J. Phys. Chem.*, 1994, **98**, 11623–11627.
- 14 C. Lee, W. Yang and R. G. Parr, *Phys. Rev. B*, 1988, **37**, 785.
- 15 Y. Zhao and D. G. Truhlar, *J. Chem. Phys.*, 2006, **125**, 194101–194117.
